# Supplementary material for: Genetic Variants of HNF4A, WFS1, DUSP9, FTO, and ZFAND6 Genes Are Associated with Prediabetes Susceptibility and Inflammatory Markers in the Saudi Arabian Population
Source: MDPI journal article supplement (doi:10.3390/genes14030536), 2023-02-21
Supplement: s1 [file s1]

**Table S1.** Association between SNPs and Pre-diabetes status

1

| SNPs       |    | Control    | Prediabetes | Unadjusted          |         | Adjusted            |         |
|------------|----|------------|-------------|---------------------|---------|---------------------|---------|
|            |    |            |             | OR (95%CI)          | p-value | OR (95%CI)          | p-value |
| rs7903146  | CC | 369 (46.8) | 153 (46.5)  | Reference           |         | Reference           |         |
|            | TC | 324 (41.1) | 143 (43.5)  | 1.06 (0.81 - 1.40)  | 0.65    | 1.02 (0.77 - 1.34)  | 0.90    |
|            | TT | 96 (12.2)  | 33 (10.0)   | 0.83 (0.53 - 1.28)  | 0.40    | 0.89 (0.57 - 1.39)  | 0.60    |
| rs5015480  | CC | 403 (51.0) | 170 (51.4)  | Reference           |         | Reference           |         |
|            | TC | 318 (40.3) | 122 (36.9)  | 0.91 (0.69 - 1.20)  | 0.50    | 0.88 (0.66 - 1.16)  | 0.36    |
|            | TT | 69 (8.7)   | 39 (11.8)   | 1.34 (0.87 - 2.06)  | 0.18    | 1.32 (0.85 - 2.06)  | 0.22    |
| rs12779790 | AA | 559 (70.8) | 219 (67.0)  | Reference           |         | Reference           |         |
|            | GA | 202 (25.6) | 95 (29.1)   | 1.20 (0.90 - 1.60)  | 0.22    | 1.23 (0.91 - 1.65)  | 0.18    |
|            | GG | 29 (3.7)   | 13 (4.0)    | 1.14 (0.58 - 2.24)  | 0.69    | 1.15 (0.58 - 2.27)  | 0.70    |
| rs10923931 | GG | 625 (79.2) | 258 (78.4)  | Reference           |         | Reference           |         |
|            | TG | 153 (19.4) | 65 (19.8)   | 1.03 (0.74 - 1.42)  | 0.86    | 0.98 (0.70 - 1.36)  | 0.90    |
|            | TT | 11 (1.4)   | 6 (1.8)     | 1.32 (0.48 - 3.61)  | 0.59    | 1.18 (0.42 - 3.30)  | 0.75    |
| rs10440833 | TT | 485 (61.7) | 200 (60.4)  | Reference           |         | Reference           |         |
|            | TA | 255 (32.4) | 107 (32.3)  | 1.02 (0.77 - 1.35)  | 0.90    | 1.02 (0.77 - 1.36)  | 0.88    |
|            | AA | 46 (5.9)   | 24 (7.3)    | 1.27 (0.75 - 2.13)  | 0.38    | 1.31 (0.76 - 2.23)  | 0.33    |
| rs11899863 | GG | 720 (90.9) | 309 (93.1)  | Reference           |         | Reference           |         |
|            | GA | 71 (9.0)   | 21 (6.3)    | 0.69 (0.42 - 1.14)  | 0.15    | 0.69 (0.41 - 1.16)  | 0.16    |
|            | AA | 1 (0.1)    | 2 (0.6)     | 4.66 (0.42 - 51.58) | 0.21    | 4.68 (0.41 - 54.00) | 0.22    |
| rs13081389 | AA | 716 (90.7) | 306 (93.3)  | Reference           |         | Reference           |         |
|            | GA | 68 (8.6)   | 21 (6.4)    | 0.72 (0.44 - 1.20)  | 0.21    | 0.76 (0.45 - 1.27)  | 0.29    |
|            | GG | 5 (0.6)    | 1 (0.3)     | 0.47 (0.05 - 4.02)  | 0.49    | 0.51 (0.06 - 4.48)  | 0.54    |
| rs3802177  | GG | 580 (73.4) | 248 (75.2)  | Reference           |         | Reference           |         |
|            | GA | 187 (23.7) | 77 (23.3)   | 0.96 (0.71 - 1.31)  | 0.81    | 0.91 (0.67 - 1.25)  | 0.56    |
|            | AA | 23 (2.9)   | 5 (1.5)     | 0.51 (0.19 - 1.35)  | 0.18    | 0.51 (0.19 - 1.36)  | 0.18    |
| rs849134   | TT | 297 (37.5) | 121 (36.6)  | Reference           |         | Reference           |         |
|            | TC | 367 (46.3) | 145 (43.8)  | 0.97 (0.73 - 1.29)  | 0.83    | 1.02 (0.76 - 1.36)  | 0.92    |
|            | CC | 128 (16.2) | 65 (19.6)   | 1.25 (0.86 - 1.80)  | 0.24    | 1.33 (0.91 - 1.93)  | 0.14    |
| rs5215     | TT | 560 (70.6) | 228 (69.1)  | Reference           |         | Reference           |         |
|            | TC | 197 (24.8) | 92 (27.9)   | 1.15 (0.86 - 1.54)  | 0.36    | 1.16 (0.86 - 1.57)  | 0.32    |
|            | CC | 36 (4.5)   | 10 (3.0)    | 0.68 (0.33 - 1.40)  | 0.30    | 0.66 (0.32 - 1.37)  | 0.27    |
| rs1470579  | AA | 364 (46.0) | 146 (44.0)  | Reference           |         | Reference           |         |
|            | CA | 296 (37.4) | 119 (35.8)  | 1.00 (0.75 - 1.33)  | 0.99    | 1.02 (0.76 - 1.36)  | 0.92    |
|            | CC | 131 (16.6) | 67 (20.2)   | 1.28 (0.90 - 1.81)  | 0.18    | 1.28 (0.89 - 1.85)  | 0.18    |
| rs6795735  | TT | 441 (55.8) | 181 (54.8)  | Reference           |         | Reference           |         |
|            | TC | 297 (37.6) | 119 (36.1)  | 0.98 (0.74 - 1.28)  | 0.86    | 0.95 (0.72 - 1.25)  | 0.71    |
|            | CC | 52 (6.6)   | 30 (9.1)    | 1.41 (0.87 - 2.28)  | 0.17    | 1.44 (0.88 - 2.37)  | 0.14    |
| rs1387153  | CC | 433 (54.9) | 167 (51.1)  | Reference           |         | Reference           |         |
|            | TC | 293 (37.2) | 126 (38.5)  | 1.11 (0.85 - 1.47)  | 0.44    | 1.10 (0.83 - 1.45)  | 0.52    |
|            | TT | 62 (7.9)   | 34 (10.4)   | 1.42 (0.90 - 2.24)  | 0.13    | 1.45 (0.91 - 2.31)  | 0.12    |
| rs243021   | TT | 323 (40.8) | 117 (35.7)  | Reference           |         | Reference           |         |

|            |    |            |            |                     |       |                    |       |
|------------|----|------------|------------|---------------------|-------|--------------------|-------|
| rs7578326  | TC | 334 (42.2) | 157 (47.9) | 1.30 (0.98 - 1.72)  | 0.07  | 1.30 (0.97 - 1.74) | 0.08  |
|            | CC | 135 (17.0) | 54 (16.5)  | 1.10 (0.76 - 1.61)  | 0.61  | 1.08 (0.73 - 1.59) | 0.69  |
|            | AA | 243 (30.9) | 101 (30.8) | Reference           |       | Reference          |       |
|            | GA | 377 (47.9) | 165 (50.3) | 1.05 (0.78 - 1.42)  | 0.73  | 1.05 (0.77 - 1.41) | 0.77  |
|            | GG | 167 (21.2) | 62 (18.9)  | 0.89 (0.62 - 1.30)  | 0.55  | 0.92 (0.63 - 1.35) | 0.67  |
| rs4457053  | AA | 350 (44.4) | 129 (38.9) | Reference           |       | Reference          |       |
|            | GA | 327 (41.5) | 161 (48.5) | 1.34 (1.01 - 1.76)  | 0.04  | 1.31 (0.99 - 1.74) | 0.06  |
|            | GG | 111 (14.1) | 42 (12.7)  | 1.03 (0.68 - 1.54)  | 0.90  | 1.04 (0.68 - 1.58) | 0.87  |
| rs972283   | GG | 277 (35.2) | 118 (35.6) | Reference           |       | Reference          |       |
|            | GA | 382 (48.6) | 149 (45.0) | 0.92 (0.69 - 1.22)  | 0.55  | 0.90 (0.67 - 1.20) | 0.46  |
|            | AA | 127 (16.2) | 64 (19.3)  | 1.18 (0.82 - 1.71)  | 0.37  | 1.18 (0.81 - 1.72) | 0.40  |
| rs896854   | AA | 229 (29.0) | 92 (27.8)  | Reference           |       | Reference          |       |
|            | GA | 351 (44.5) | 165 (49.8) | 1.17 (0.86 - 1.59)  | 0.31  | 1.23 (0.90 - 1.67) | 0.20  |
|            | GG | 209 (26.5) | 74 (22.4)  | 0.88 (0.62 - 1.26)  | 0.49  | 0.93 (0.64 - 1.34) | 0.70  |
| rs13292136 | CC | 774 (97.9) | 321 (97.0) | Reference           |       | Reference          |       |
|            | TC | 16 (2.0)   | 10 (3.0)   | 1.51 (0.68 - 3.36)  | 0.32  | 1.39 (0.62 - 3.12) | 0.43  |
|            | TT | 1 (0.1)    | 0 (0.0)    | 0.80 (0.03 - 19.7)  | 0.89  | 0.00 (0.00 - 0.00) | 0.99  |
| rs231362   | TT | 250 (31.6) | 96 (29.1)  | Reference           |       | Reference          |       |
|            | TC | 362 (45.7) | 169 (51.2) | 1.22 (0.90 - 1.64)  | 0.20  | 1.22 (0.90 - 1.66) | 0.19  |
|            | CC | 180 (22.7) | 65 (19.7)  | 0.94 (0.65 - 1.36)  | 0.74  | 0.90 (0.62 - 1.31) | 0.58  |
| rs1552224  | TT | 760 (96.0) | 312 (94.5) | Reference           |       | Reference          |       |
|            | TG | 30 (3.8)   | 18 (5.5)   | 1.46 (0.80 - 2.66)  | 0.21  | 1.52 (0.83 - 2.79) | 0.18  |
|            | GG | 2 (0.3)    | 0 (0.0)    | 0.48 (0.02 - 10.17) | 0.64  | 0.00 (0.00 - 0.00) | 0.99  |
| rs7957197  | TT | 572 (72.8) | 233 (70.6) | Reference           |       | Reference          |       |
|            | TA | 194 (24.7) | 83 (25.2)  | 1.05 (0.78 - 1.42)  | 0.75  | 1.02 (0.75 - 1.38) | 0.91  |
|            | AA | 20 (2.5)   | 14 (4.2)   | 1.72 (0.85 - 3.46)  | 0.13  | 1.82 (0.90 - 3.70) | 0.10  |
| rs11634397 | GG | 244 (30.8) | 114 (34.4) | Reference           |       | Reference          |       |
|            | GA | 402 (50.8) | 142 (42.9) | 0.76 (0.56 - 1.01)  | 0.06  | 0.75 (0.56 - 1.01) | 0.06  |
|            | AA | 146 (18.4) | 75 (22.7)  | 1.10 (0.77 - 1.57)  | 0.60  | 1.06 (0.74 - 1.53) | 0.75  |
| rs8042680  | AA | 229 (29.1) | 80 (24.6)  | Reference           |       | Reference          |       |
|            | CA | 347 (44.1) | 154 (47.4) | 1.27 (0.92 - 1.75)  | 0.14  | 1.19 (0.86 - 1.64) | 0.30  |
|            | CC | 211 (26.8) | 91 (28.0)  | 1.23 (0.87 - 1.76)  | 0.24  | 1.21 (0.84 - 1.73) | 0.31  |
| rs5945326  | AA | 628 (79.5) | 282 (85.2) | Reference           |       | Reference          |       |
|            | GA | 122 (15.4) | 30 (9.1)   | 0.55 (0.36 - 0.84)  | 0.005 | 0.60 (0.39 - 0.92) | 0.02  |
|            | GG | 40 (5.1)   | 19 (5.7)   | 1.06 (0.60 - 1.86)  | 0.84  | 1.03 (0.58 - 1.83) | 0.92  |
| rs163184   | TT | 247 (31.5) | 97 (29.6)  | Reference           |       | Reference          |       |
|            | TG | 359 (45.7) | 161 (49.1) | 1.14 (0.85 - 1.54)  | 0.39  | 1.18 (0.87 - 1.61) | 0.28  |
|            | GG | 179 (22.8) | 70 (21.3)  | 1.00 (0.69 - 1.43)  | 0.98  | 1.04 (0.72 - 1.51) | 0.82  |
| rs4430796  | GG | 259 (32.9) | 120 (36.5) | Reference           |       | Reference          |       |
|            | GA | 366 (46.4) | 146 (44.4) | 0.86 (0.64 - 1.15)  | 0.31  | 0.85 (0.63 - 1.14) | 0.28  |
|            | AA | 163 (20.7) | 63 (19.1)  | 0.83 (0.58 - 1.20)  | 0.33  | 0.84 (0.58 - 1.21) | 0.34  |
| rs4812829  | GG | 485 (61.6) | 231 (70.0) | Reference           |       | Reference          |       |
|            | GA | 273 (34.7) | 83 (25.2)  | 0.64 (0.48 - 0.85)  | 0.003 | 0.64 (0.47 - 0.86) | 0.003 |
|            | AA | 29 (3.7)   | 16 (4.8)   | 1.16 (0.62 - 2.18)  | 0.65  | 1.17 (0.62 - 2.22) | 0.63  |
| rs1802295  | CC | 369 (47.5) | 162 (49.4) | Reference           |       | Reference          |       |

|            |    |            |            |                    |       |                    |       |
|------------|----|------------|------------|--------------------|-------|--------------------|-------|
|            | TC | 325 (41.8) | 137 (41.8) | 0.96 (0.73 - 1.26) | 0.77  | 0.95 (0.72 - 1.26) | 0.73  |
|            | TT | 83 (10.7)  | 29 (8.8)   | 0.80 (0.50 - 1.26) | 0.33  | 0.85 (0.53 - 1.35) | 0.48  |
|            | GG | 340 (43.1) | 134 (40.7) | Reference          |       | Reference          |       |
| rs7178572  | GA | 336 (42.6) | 157 (47.7) | 1.19 (0.90 - 1.56) | 0.23  | 1.21 (0.91 - 1.60) | 0.19  |
|            | AA | 112 (14.2) | 38 (11.6)  | 0.86 (0.57 - 1.31) | 0.48  | 0.85 (0.56 - 1.31) | 0.47  |
|            | AA | 493 (62.5) | 202 (61.6) | Reference          |       | Reference          |       |
| rs2028299  | CA | 255 (32.3) | 103 (31.4) | 0.99 (0.74 - 1.31) | 0.92  | 0.96 (0.72 - 1.28) | 0.80  |
|            | CC | 41 (5.2)   | 23 (7.0)   | 1.37 (0.80 - 2.34) | 0.25  | 1.42 (0.83 - 2.45) | 0.20  |
|            | AA | 335 (42.7) | 155 (47.0) | Reference          |       | Reference          |       |
| rs3923113  | CA | 346 (44.1) | 139 (42.1) | 0.87 (0.66 - 1.14) | 0.31  | 0.85 (0.65 - 1.13) | 0.27  |
|            | CC | 103 (13.1) | 36 (10.9)  | 0.76 (0.49 - 1.15) | 0.20  | 0.75 (0.49 - 1.16) | 0.20  |
|            | CC | 573 (72.9) | 242 (73.3) | Reference          |       | Reference          |       |
| rs16861329 | TC | 192 (24.4) | 80 (24.2)  | 0.99 (0.73 - 1.33) | 0.93  | 0.98 (0.72 - 1.33) | 0.90  |
|            | TT | 21 (2.7)   | 8 (2.4)    | 0.90 (0.39 - 2.06) | 0.81  | 0.89 (0.38 - 2.07) | 0.79  |
|            | GG | 424 (53.9) | 172 (52.6) | Reference          |       | Reference          |       |
|            | GC | 284 (36.1) | 129 (39.4) | 1.12 (0.85 - 1.47) | 0.42  | 1.08 (0.82 - 1.43) | 0.59  |
| rs1531343  | CC | 79 (10.0)  | 26 (8.0)   | 0.81 (0.50 - 1.31) | 0.39  | 0.74 (0.45 - 1.22) | 0.24  |
|            | TT | 222 (28.4) | 129 (39.0) | Reference          |       | Reference          |       |
| rs1801214  | TC | 405 (51.7) | 142 (42.9) | 0.60 (0.45 - 0.81) | 0.001 | 0.60 (0.44 - 0.80) | 0.001 |
|            | CC | 156 (19.9) | 60 (18.1)  | 0.66 (0.46 - 0.96) | 0.03  | 0.67 (0.46 - 0.98) | 0.04  |
|            | GG | 446 (56.8) | 188 (57.5) | Reference          |       | Reference          |       |
| rs10965250 | GA | 291 (37.1) | 118 (36.1) | 0.96 (0.73 - 1.26) | 0.78  | 0.97 (0.73 - 1.28) | 0.82  |
|            | AA | 48 (6.1)   | 21 (6.4)   | 1.04 (0.60 - 1.78) | 0.89  | 1.09 (0.63 - 1.89) | 0.75  |
|            | CC | 332 (42.2) | 124 (37.6) | Reference          |       | Reference          |       |
| rs11642841 | CA | 349 (44.3) | 144 (43.6) | 1.10 (0.83 - 1.47) | 0.49  | 1.08 (0.81 - 1.45) | 0.58  |
|            | AA | 106 (13.5) | 62 (18.8)  | 1.57 (1.08 - 2.28) | 0.02  | 1.50 (1.02 - 2.21) | 0.04  |

Note: Data presented as N (%) and Odds ratio (95% CI) obtained from logistic regression; Adjusted indicates results adjusted for covariates i.e. age, gender and BMI; *p*-value < 0.05 was considered significant.

2  
3  
4  
5  
6  
7  
8  
9  
10  
11  
12  
13

Table S2: Hardy-Weinberg Equilibrium

14

| SNPs       |    | Control    | Prediabetes | HWE<br>Test<br><i>p</i> -value | Unadjusted         |                 | Adjusted           |                 |
|------------|----|------------|-------------|--------------------------------|--------------------|-----------------|--------------------|-----------------|
|            |    |            |             |                                | OR (95%CI)         | <i>p</i> -value | OR (95%CI)         | <i>p</i> -value |
| rs11634397 | GG | 244 (30.8) | 114 (34.4)  | 0.41                           | Reference          |                 | Reference          |                 |
|            | GA | 402 (50.8) | 142 (42.9)  |                                | 0.76 (0.56 - 1.01) | 0.06            | 0.75 (0.56 - 1.01) | 0.05            |
|            | AA | 146 (18.4) | 75 (22.7)   |                                | 1.10 (0.77 - 1.57) | 0.60            | 1.06 (0.74 - 1.53) | 0.75            |
| rs5945326  | AA | 628 (79.5) | 282 (85.2)  | <0.001                         | Reference          |                 | Reference          |                 |
|            | GA | 122 (15.4) | 30 (9.1)    |                                | 0.55 (0.36 - 0.84) | 0.005           | 0.60 (0.39 - 0.92) | 0.01            |
|            | GG | 40 (5.1)   | 19 (5.7)    |                                | 1.06 (0.60 - 1.86) | 0.84            | 1.03 (0.58 - 1.83) | 0.92            |
| rs4812829  | GG | 485 (61.6) | 231 (70.0)  | 0.22                           | Reference          |                 | Reference          |                 |
|            | GA | 273 (34.7) | 83 (25.2)   |                                | 0.64 (0.48 - 0.85) | 0.003           | 0.64 (0.47 - 0.86) | <0.01           |
|            | AA | 29 (3.7)   | 16 (4.8)    |                                | 1.16 (0.62 - 2.18) | 0.65            | 1.17 (0.62 - 2.22) | 0.63            |
| rs1801214  | TT | 222 (28.4) | 129 (39.0)  | 0.24                           | Reference          |                 | Reference          |                 |
|            | TC | 405 (51.7) | 142 (42.9)  |                                | 0.60 (0.45 - 0.81) | 0.001           | 0.60 (0.44 - 0.80) | <0.01           |
|            | CC | 156 (19.9) | 60 (18.1)   |                                | 0.66 (0.46 - 0.96) | 0.03            | 0.67 (0.46 - 0.98) | 0.04            |
| rs11642841 | CC | 332 (42.2) | 124 (37.6)  | 0.33                           | Reference          |                 | Reference          |                 |
|            | CA | 349 (44.3) | 144 (43.6)  |                                | 1.10 (0.83 - 1.47) | 0.49            | 1.08 (0.81 - 1.45) | 0.58            |
|            | AA | 106 (13.5) | 62 (18.8)   |                                | 1.57 (1.08 - 2.28) | 0.02            | 1.50 (1.02 - 2.21) | 0.03            |

Note: Data presented as N (%) and Odds ratio (95% CI) obtained from logistic regression; Adjusted indicates results adjusted for covariates i.e. age, gender and BMI; *p*-value < 0.05 was considered significant.

15

16

17

18
